# Supplementary material
Source: PubMed Central journal article supplement (PMC4412040)
Supplement: NIHMS677556-supplement-Supplemental.pdf [file NIHMS677556-supplement-Supplemental.pdf]

Table 1: Scenario A: Linear temporal feature. Reported values are the median (IQR) of the time-dependent AUC for 1000 simulations of training and testing samples of N=500 each.

|                   | $J$ | Method         | $\sigma_\epsilon^2 = .1$ | $\sigma_\epsilon^2 = 1$ | $\sigma_\epsilon^2 = 10$ | $\sigma_\epsilon^2 = 20$ | $\sigma_\epsilon^2 = 40$ |
|-------------------|-----|----------------|--------------------------|-------------------------|--------------------------|--------------------------|--------------------------|
| $\sigma_1^2 = .5$ | 4   | True           | 0.868 (0.054)            | 0.867 (0.055)           | 0.874 (0.057)            | 0.876 (0.052)            | 0.877 (0.052)            |
|                   |     | Naive          | 0.732 (0.069)            | 0.73 (0.068)            | 0.716 (0.069)            | 0.712 (0.068)            | 0.699 (0.067)            |
|                   |     | Fixed-Effects  | 0.832 (0.066)            | 0.775 (0.074)           | 0.731 (0.075)            | 0.72 (0.069)             | 0.703 (0.074)            |
|                   |     | Random Effects | 0.834 (0.064)            | 0.778 (0.07)            | 0.722 (0.073)            | 0.712 (0.072)            | 0.693 (0.084)            |
|                   |     | Last           | 0.775 (0.071)            | 0.76 (0.07)             | 0.714 (0.077)            | 0.705 (0.079)            | 0.695 (0.084)            |
|                   | 8   | True           | 0.87 (0.054)             | 0.868 (0.058)           | 0.874 (0.056)            | 0.876 (0.057)            | 0.877 (0.052)            |
|                   |     | Naive          | 0.734 (0.071)            | 0.735 (0.069)           | 0.721 (0.073)            | 0.714 (0.072)            | 0.696 (0.068)            |
|                   |     | Fixed Effects  | 0.858 (0.053)            | 0.83 (0.066)            | 0.769 (0.071)            | 0.75 (0.073)             | 0.727 (0.073)            |
|                   |     | Random Effects | 0.858 (0.055)            | 0.831 (0.066)           | 0.78 (0.075)             | 0.765 (0.071)            | 0.742 (0.075)            |
|                   |     | Last           | 0.8 (0.062)              | 0.793 (0.073)           | 0.762 (0.078)            | 0.739 (0.068)            | 0.713 (0.08)             |
|                   | 12  | True           | 0.869 (0.058)            | 0.871 (0.06)            | 0.872 (0.053)            | 0.873 (0.051)            | 0.877 (0.05)             |
|                   |     | Naive          | 0.734 (0.071)            | 0.732 (0.072)           | 0.719 (0.07)             | 0.712 (0.066)            | 0.702 (0.071)            |
|                   |     | Fixed Effects  | 0.863 (0.06)             | 0.847 (0.062)           | 0.805 (0.069)            | 0.779 (0.071)            | 0.757 (0.074)            |
|                   |     | Random Effects | 0.862 (0.06)             | 0.848 (0.062)           | 0.814 (0.064)            | 0.799 (0.063)            | 0.785 (0.064)            |
|                   |     | Last           | 0.812 (0.067)            | 0.811 (0.07)            | 0.792 (0.072)            | 0.774 (0.074)            | 0.748 (0.078)            |
| $\sigma_1^2 = 2$  | 4   | True           | 0.876 (0.049)            | 0.878 (0.05)            | 0.879 (0.052)            | 0.88 (0.051)             | 0.883 (0.05)             |
|                   |     | Naive          | 0.762 (0.063)            | 0.762 (0.066)           | 0.747 (0.071)            | 0.732 (0.058)            | 0.72 (0.071)             |
|                   |     | Fixed Effects  | 0.86 (0.057)             | 0.828 (0.062)           | 0.783 (0.069)            | 0.76 (0.065)             | 0.738 (0.073)            |
|                   |     | Random Effects | 0.861 (0.057)            | 0.831 (0.062)           | 0.783 (0.068)            | 0.766 (0.073)            | 0.742 (0.072)            |
|                   |     | Last           | 0.811 (0.063)            | 0.809 (0.065)           | 0.777 (0.072)            | 0.753 (0.069)            | 0.73 (0.075)             |
|                   | 8   | True           | 0.879 (0.051)            | 0.876 (0.057)           | 0.88 (0.048)             | 0.881 (0.055)            | 0.885 (0.05)             |
|                   |     | Naive          | 0.768 (0.062)            | 0.762 (0.067)           | 0.744 (0.065)            | 0.731 (0.071)            | 0.717 (0.064)            |
|                   |     | Fixed Effects  | 0.873 (0.053)            | 0.856 (0.057)           | 0.819 (0.062)            | 0.802 (0.065)            | 0.78 (0.069)             |
|                   |     | Random Effects | 0.872 (0.053)            | 0.857 (0.053)           | 0.833 (0.062)            | 0.816 (0.067)            | 0.808 (0.067)            |
|                   |     | Last           | 0.836 (0.065)            | 0.834 (0.065)           | 0.819 (0.066)            | 0.802 (0.065)            | 0.782 (0.069)            |
|                   | 12  | True           | 0.874 (0.054)            | 0.881 (0.053)           | 0.879 (0.048)            | 0.882 (0.052)            | 0.883 (0.05)             |
|                   |     | Naive          | 0.769 (0.063)            | 0.765 (0.066)           | 0.745 (0.065)            | 0.732 (0.069)            | 0.717 (0.065)            |
|                   |     | Fixed Effects  | 0.873 (0.052)            | 0.871 (0.053)           | 0.844 (0.057)            | 0.829 (0.061)            | 0.813 (0.061)            |
|                   |     | Random Effects | 0.873 (0.052)            | 0.873 (0.056)           | 0.852 (0.055)            | 0.842 (0.058)            | 0.832 (0.058)            |
|                   |     | Last           | 0.848 (0.058)            | 0.851 (0.063)           | 0.837 (0.061)            | 0.828 (0.064)            | 0.811 (0.058)            |

Table 2: Scenario B: Linear and quadratic temporal features. Reported values are the median (IQR) of the time-dependent AUC for 1000 simulations of training and testing samples of N=500 each.

|                    | $J$ | Method         | $\sigma_\epsilon^2 = .1$ | $\sigma_\epsilon^2 = 1$ | $\sigma_\epsilon^2 = 10$ | $\sigma_\epsilon^2 = 20$ | $\sigma_\epsilon^2 = 40$ |
|--------------------|-----|----------------|--------------------------|-------------------------|--------------------------|--------------------------|--------------------------|
| $\sigma_1^2 = .01$ | 8   | True           | 0.756 (0.083)            | 0.758 (0.078)           | 0.761 (0.075)            | 0.77 (0.074)             | 0.793 (0.072)            |
|                    |     | Naive          | 0.587 (0.123)            | 0.572 (0.121)           | 0.502 (0.095)            | 0.5 (0.084)              | 0.5 (0.061)              |
|                    |     | Fixed Effects  | 0.746 (0.083)            | 0.717 (0.092)           | 0.637 (0.097)            | 0.592 (0.091)            | 0.55 (0.097)             |
|                    |     | Random Effects | 0.746 (0.084)            | 0.719 (0.09)            | 0.635 (0.094)            | 0.594 (0.089)            | 0.556 (0.096)            |
|                    |     | Last           | 0.66 (0.096)             | 0.641 (0.099)           | 0.599 (0.093)            | 0.577 (0.097)            | 0.554 (0.098)            |
|                    | 12  | True           | 0.759 (0.082)            | 0.761 (0.081)           | 0.76 (0.084)             | 0.757 (0.077)            | 0.772 (0.076)            |
|                    |     | Naive          | 0.599 (0.105)            | 0.599 (0.113)           | 0.561 (0.12)             | 0.532 (0.105)            | 0.5 (0.069)              |
|                    |     | Fixed Effects  | 0.755 (0.085)            | 0.737 (0.087)           | 0.686 (0.092)            | 0.658 (0.091)            | 0.623 (0.093)            |
|                    |     | Random Effects | 0.755 (0.085)            | 0.737 (0.088)           | 0.69 (0.093)             | 0.656 (0.092)            | 0.623 (0.093)            |
|                    |     | Last           | 0.668 (0.095)            | 0.67 (0.096)            | 0.628 (0.098)            | 0.617 (0.091)            | 0.584 (0.092)            |
| $\sigma_1^2 = .5$  | 8   | True           | 0.826 (0.069)            | 0.828 (0.072)           | 0.834 (0.068)            | 0.838 (0.067)            | 0.85 (0.059)             |
|                    |     | Naive          | 0.617 (0.166)            | 0.616 (0.166)           | 0.622 (0.145)            | 0.628 (0.14)             | 0.635 (0.115)            |
|                    |     | Fixed Effects  | 0.815 (0.069)            | 0.783 (0.078)           | 0.698 (0.086)            | 0.66 (0.087)             | 0.632 (0.087)            |
|                    |     | Random Effects | 0.815 (0.07)             | 0.783 (0.077)           | 0.701 (0.081)            | 0.663 (0.08)             | 0.639 (0.077)            |
|                    |     | Last           | 0.694 (0.079)            | 0.693 (0.084)           | 0.668 (0.078)            | 0.646 (0.076)            | 0.627 (0.078)            |
|                    | 12  | True           | 0.864 (0.05)             | 0.864 (0.05)            | 0.863 (0.055)            | 0.864 (0.054)            | 0.863 (0.049)            |
|                    |     | Naive          | 0.686 (0.068)            | 0.685 (0.07)            | 0.681 (0.074)            | 0.684 (0.071)            | 0.679 (0.072)            |
|                    |     | Fixed Effects  | 0.858 (0.053)            | 0.839 (0.053)           | 0.787 (0.068)            | 0.76 (0.067)             | 0.729 (0.073)            |
|                    |     | Random Effects | 0.858 (0.053)            | 0.839 (0.054)           | 0.791 (0.067)            | 0.763 (0.068)            | 0.728 (0.075)            |
|                    |     | Last           | 0.719 (0.066)            | 0.716 (0.069)           | 0.706 (0.073)            | 0.698 (0.067)            | 0.688 (0.066)            |
